# Supplementary material
Source: Springer Nature journal article supplement (https://www.springermedizin.de/resource/supplementary/13058_2014_3422_MOESM3_ESM.pdf/9704134)
Supplement: MOESM3 [file 9704134]

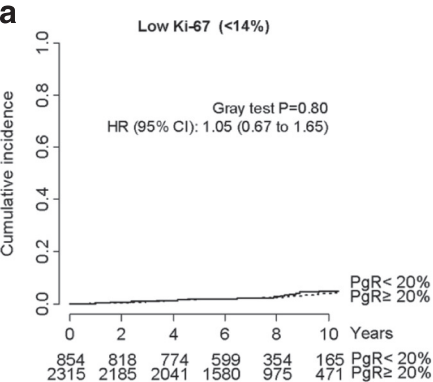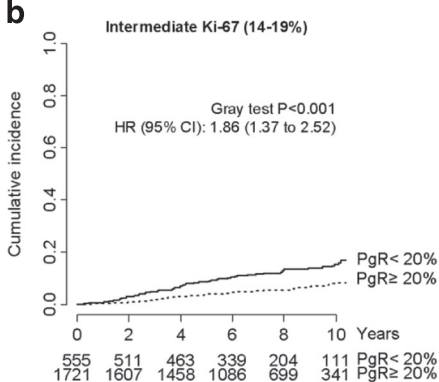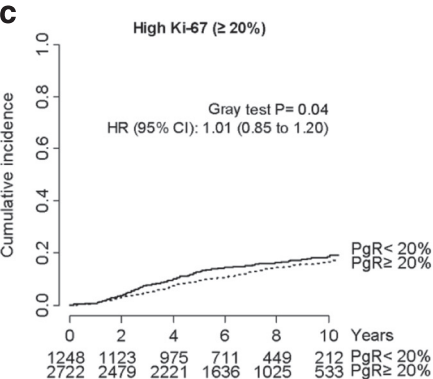

**d** Patients (10-year cumulative incidence)

|               | PgR ≥ 20%    | PgR < 20%    |
|---------------|--------------|--------------|
| Ki-67 <14%    | 2315 ( 3.9%) | 854 ( 4.9%)  |
| Ki-67: 14-19% | 1721 ( 8.1%) | 555 (15.5%)  |
| Ki-67 ≥ 20%   | 2722 (16.7%) | 1248 (18.5%) |

**e** Hazards Ratio (95% CI)

|               | PgR ≥ 20            | PgR < 20%           |
|---------------|---------------------|---------------------|
| Ki-67 <14%    | 1.00                | 1.05 (0.67 to 1.65) |
| Ki-67: 14-19% | 1.27 (0.93 to 1.75) | 2.36 (1.67 to 3.34) |
| Ki-67 ≥ 20%   | 1.93 (1.45 to 2.58) | 1.96 (1.44 to 2.67) |
